# Supplementary material for: Hyperuricemia is associated with intermittent hand joint pain in a cross sectional study of elderly females: The AGES-Reykjavik Study
Source: PLOS journal article supplement (doi:10.1371/journal.pone.0221474), 2019-08-23
Supplement: S2 (10.1371/journal.pone.0221474.s002) [file journal.pone.0221474.s002]

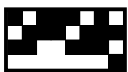

30670

## Joint pain

Do you sometimes have pain in your hands?

☐ Yes    No ☐

Where do you feel the pain? (mark the diagram)

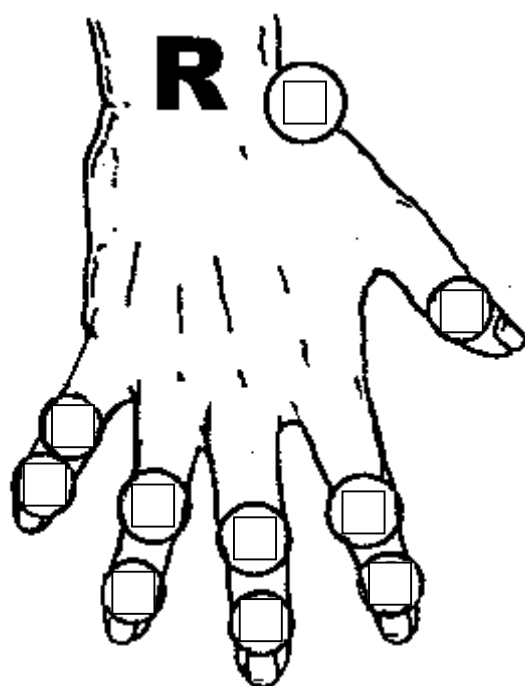

RIGHT HAND

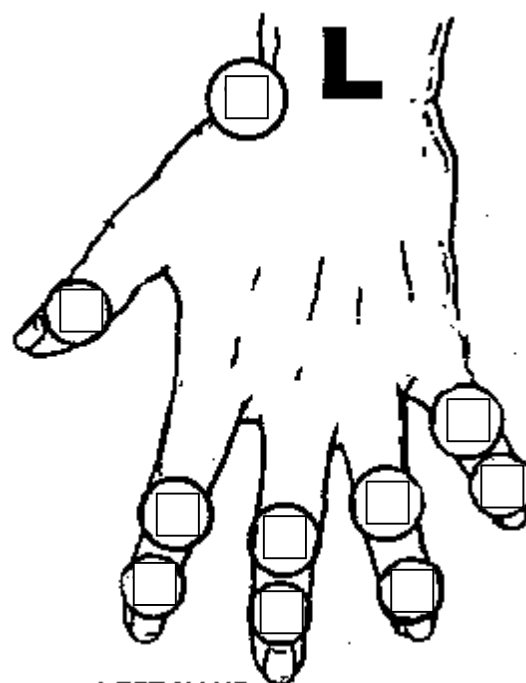

LEFT HAND

Comments:
